# Supplementary material for: Bimetallic-ion co-intercalation to stabilize vanadium–oxygen bonds towards high-performance aqueous zinc-ion storage
Source: Royal Society of Chemistry journal article supplement (doi:10.1039/d4ta05938g), 2024-11-21
Supplement: d4ta05938g1.pdf [file d4ta05938g1.pdf]

*Electronic Supplementary Material (ESI) for Journal of Materials Chemistry A.*

**Bimetallic-ions co-intercalation to stabilize vanadium-oxygen bond towards high-performance aqueous zinc-ion storage**

*Yulin Jiang,<sup>a</sup> Xia Wen,<sup>a</sup> Yinuo Li,<sup>a</sup> Yuhang Li,<sup>a</sup> Yanan Peng,<sup>a</sup> Wang Feng,<sup>a</sup> Xiaohui Li,<sup>a</sup> Junbo Yang,<sup>a</sup> Luying Song,<sup>a</sup> Ling Huang,<sup>a</sup> Hang Sun<sup>a</sup> and Jianping Shi<sup>\*a</sup>*

<sup>a</sup> The Institute for Advanced Studies, Wuhan University, Wuhan 430072, China.

\*Email: [jianpingshi@whu.edu.cn](mailto:jianpingshi@whu.edu.cn)

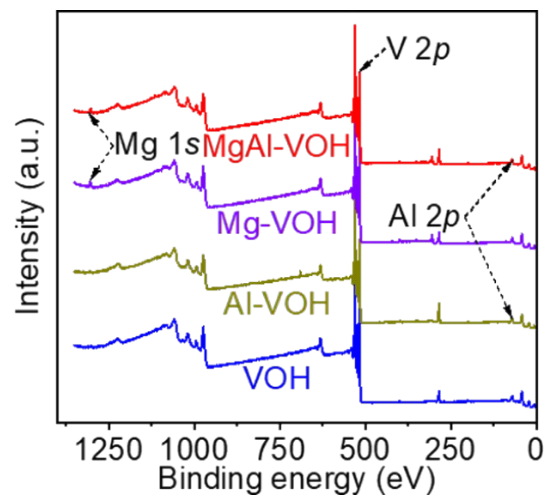

Fig. S1 XPS spectra of MgAl-VOH, Mg-VOH, Al-VOH, and pure VOH. The coexistence of Mg and Al signals indicates the successful achievement of MgAl-VOH using the unique bimetallic-ions co-intercalated strategy.

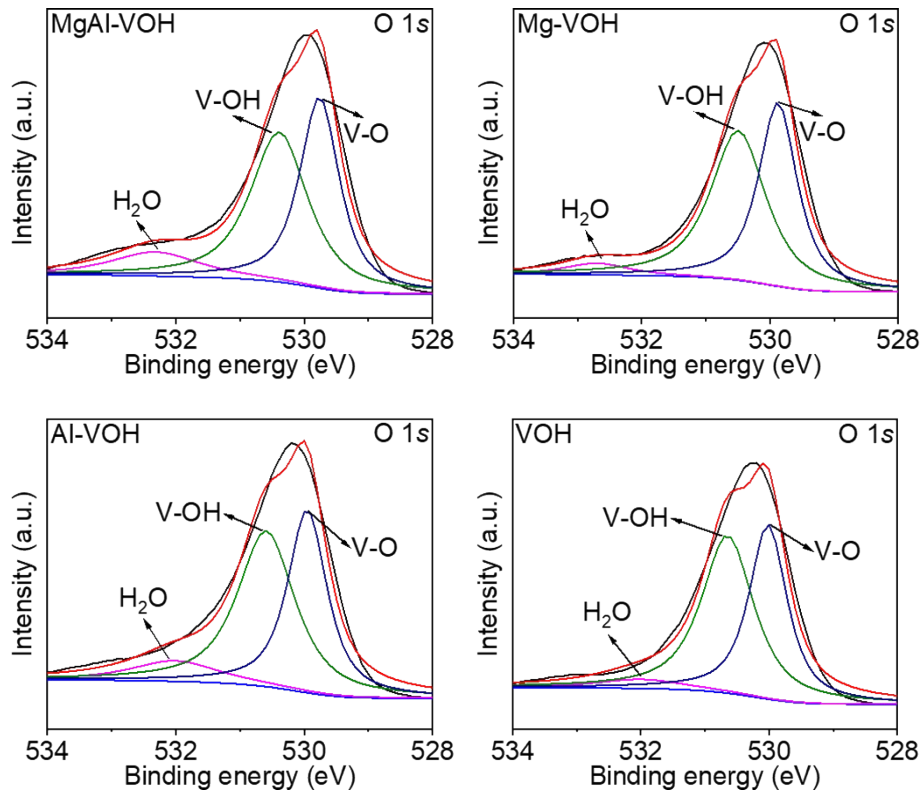

Fig. S2 O 1s XPS spectra of MgAl-VOH, Mg-VOH, Al-VOH, and pure VOH. The Al-O and Mg-O peaks are not observed in such samples, implying that  $\text{Mg}^{2+}$  and  $\text{Al}^{3+}$  ions are intercalated rather than doped in VOH.

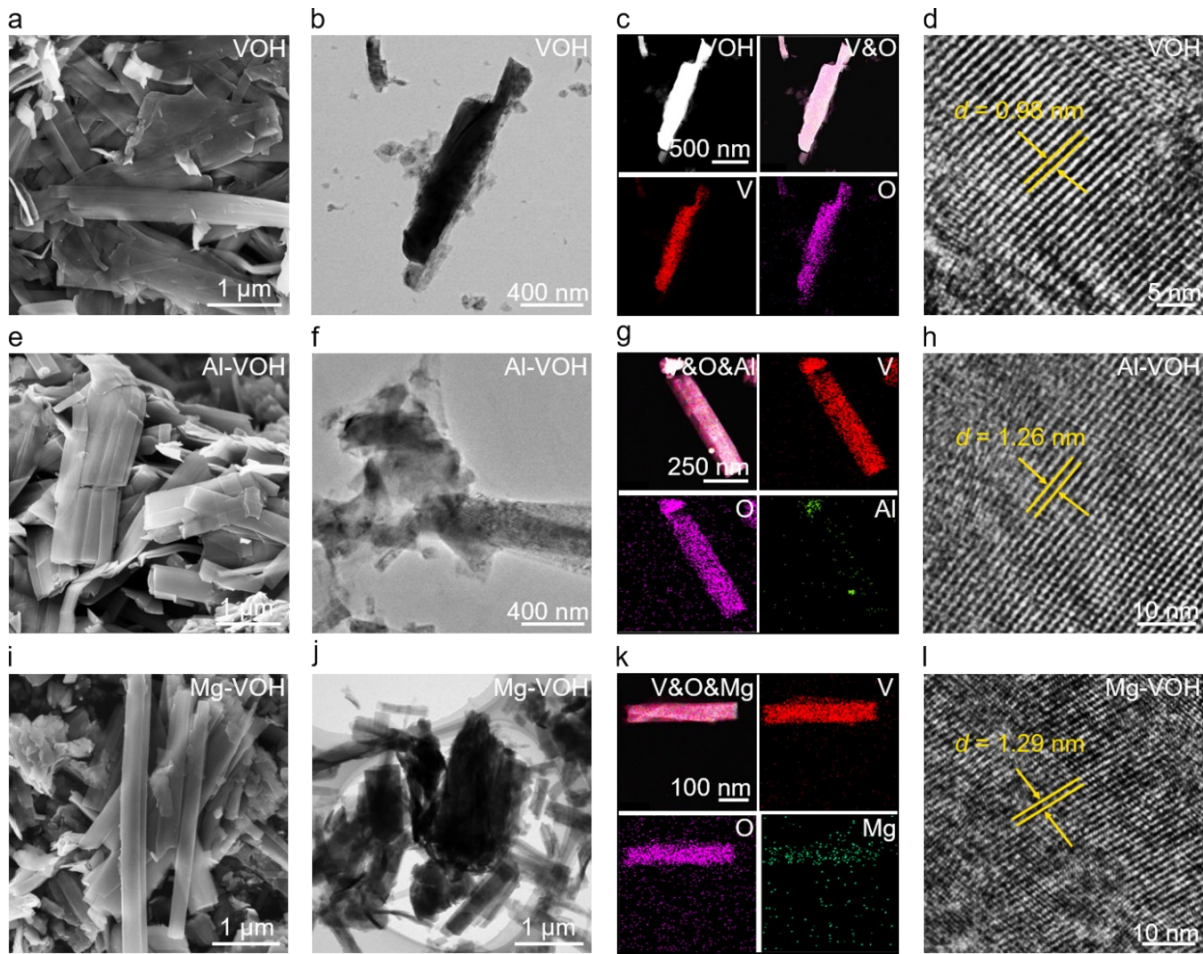

Fig. S3 The morphologies and chemical compositions characterizations of Mg-VOH, Al-VOH, and pure VOH. (a,e,i) SEM images of Mg-VOH, Al-VOH, and pure VOH, showing their nanobelt morphologies. (b,f,j) TEM images of Mg-VOH, Al-VOH, and pure VOH. (c,g,k) EDS mapping images of Mg-VOH, Al-VOH, and pure VOH, revealing their uniform elements distributions. (d,h,l) Atomic resolution TEM images of Mg-VOH, Al-VOH, and pure VOH. The large interlayer spacings are observed in Mg-VOH (1.29 nm) and Al-VOH (1.26 nm) comparing with the pure VOH (0.98 nm).

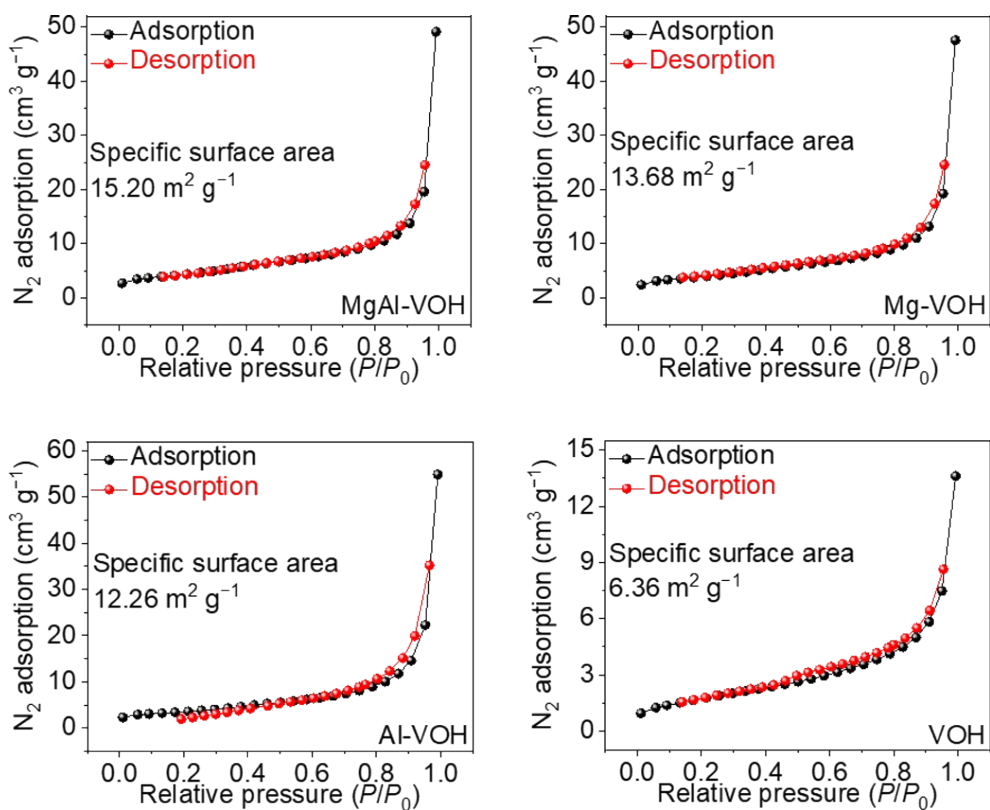

Fig. S4 The specific surface area calculations for MgAl-VOH, Mg-VOH, Al-VOH, and pure VOH.

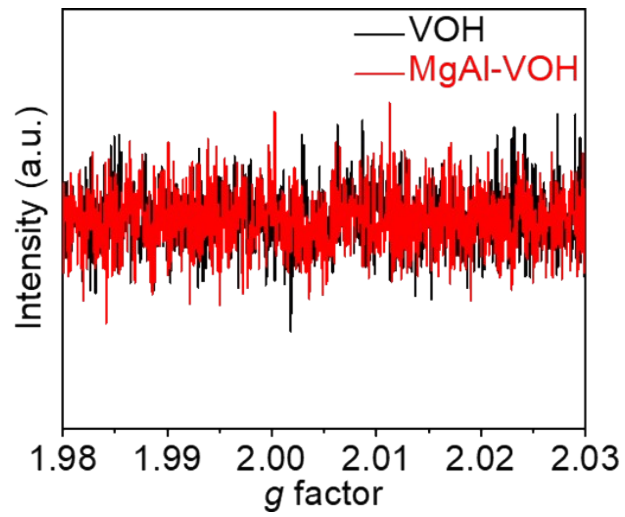

Fig. S5 EPR spectra of MgAl-VOH and pure VOH, showing that the oxygen vacancies are not observed after introducing  $\text{Al}^{3+}$  and  $\text{Mg}^{2+}$  ions.

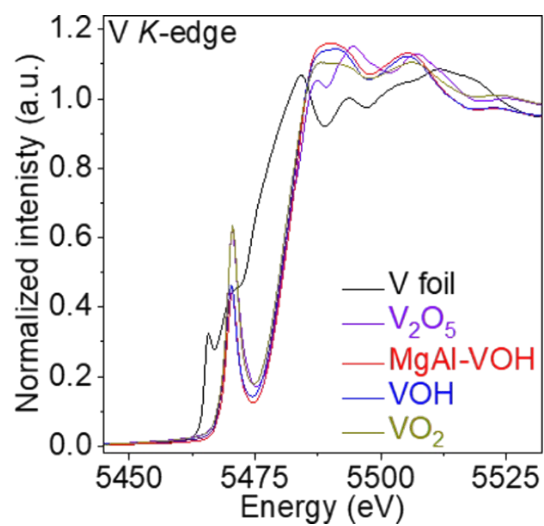

Fig. S6 XANES spectra of MgAl-VOH, VOH, V foil, V<sub>2</sub>O<sub>5</sub>, and VO<sub>2</sub>, respectively. The existence and low strength of pre-edge in MgAl-VOH indicates the abundant 3*d* electrons of V.

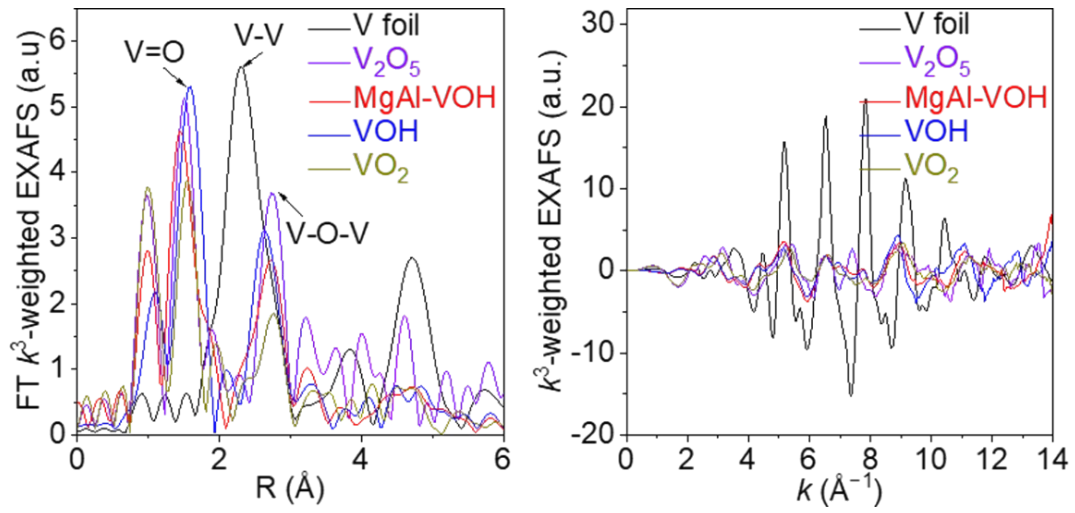

Fig. S7 EXAFS measurement results of MgAl-VOH, VOH, V foil,  $V_2O_5$ , and  $VO_2$ , respectively. The smaller V=O bond length in MgAl-VOH than that in VOH should stabilize the V=O bonds significantly.



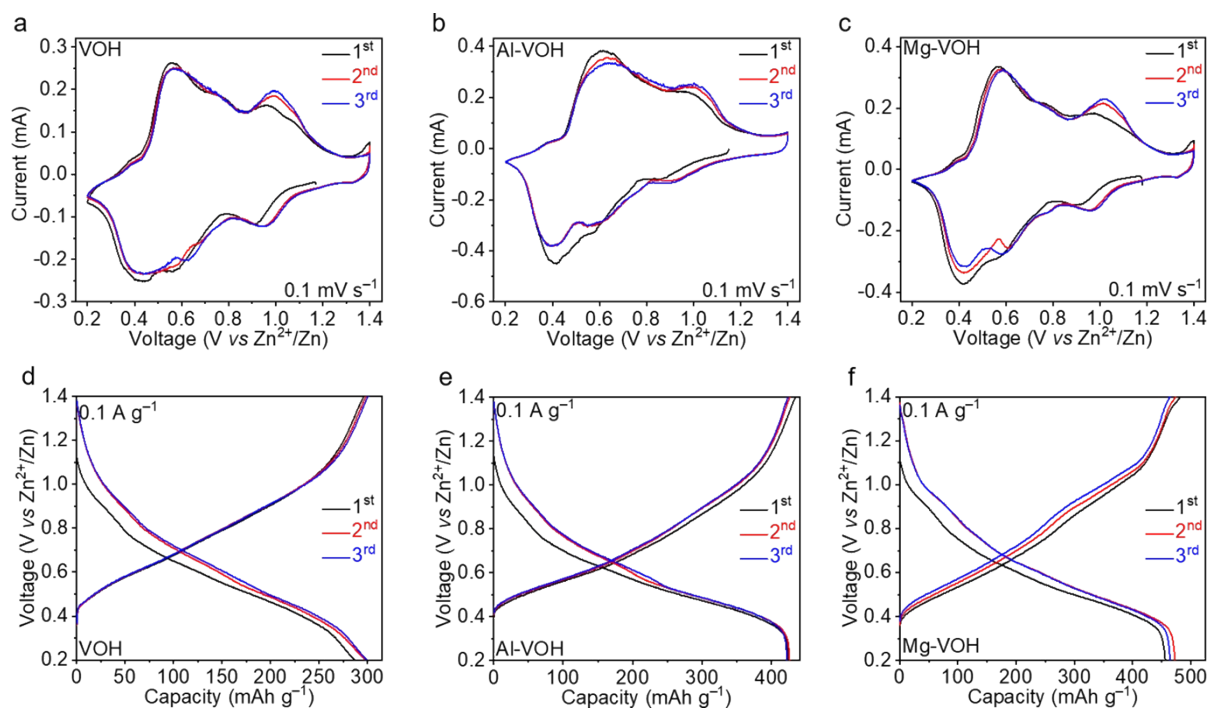

Fig. S8 Electrochemical performances of Mg-VOH, Al-VOH, and pure VOH. (a–c) CV curves of Mg-VOH, Al-VOH, and pure VOH in the first three cycles with a scan rate of 0.1 mV s<sup>-1</sup>. (d–f) Charging and discharging curves of Mg-VOH, Al-VOH, and pure VOH in the first three cycles at a current density of 0.1 A g<sup>-1</sup>.

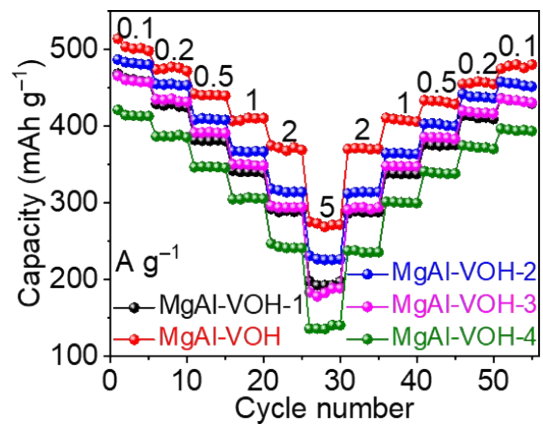

Fig. S9 Rate capabilities of MgAl-VOH with different Mg<sup>2+</sup> and Al<sup>3+</sup> ions concentrations.

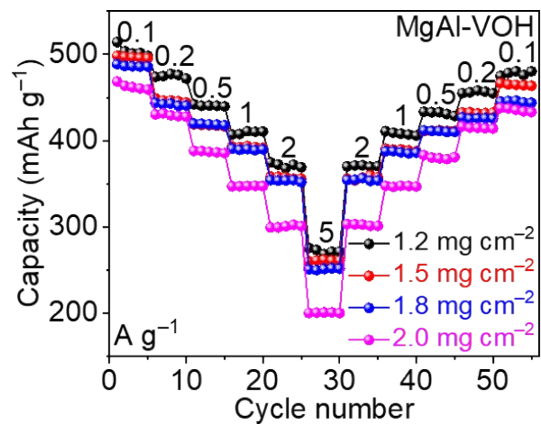

Fig. S10 Rate capabilities of MgAl-VOH with the mass loadings of 1.2, 1.5, 1.8, and 2.0  $\text{mg cm}^{-2}$ , respectively.

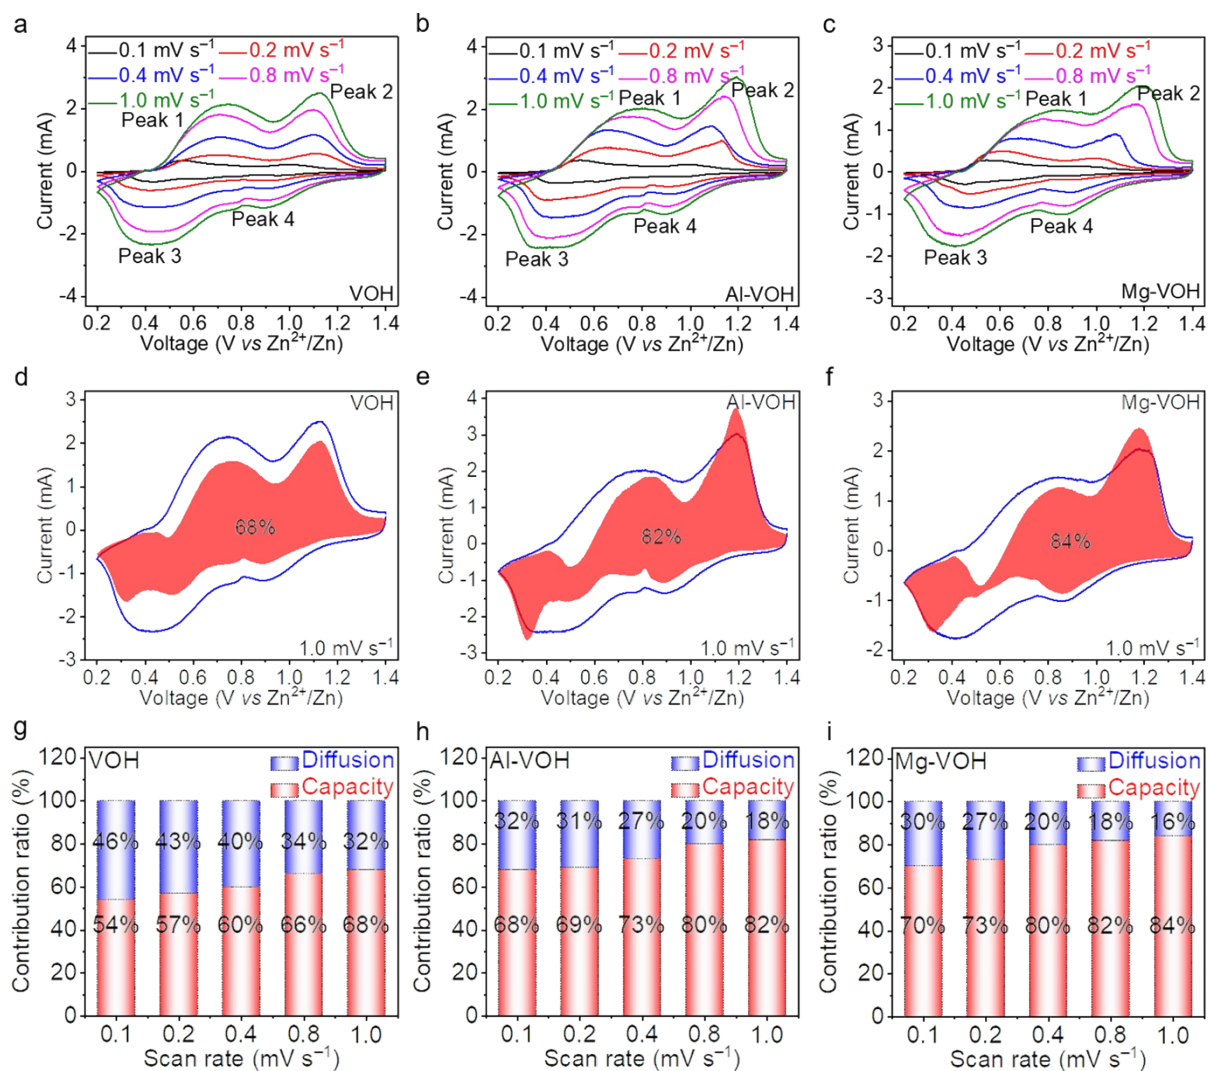

Fig. S11 Electrochemical kinetics of Mg-VOH, Al-VOH, and pure VOH. (a–c) CV curves of Mg-VOH, Al-VOH, and pure VOH at different scan rates. (d–f) CV profiles of Mg-VOH, Al-VOH, and pure VOH with the capacitive contribution at a scan rate of 1.0 mV s<sup>-1</sup>. (g–i) Capacitive contributions in Mg-VOH, Al-VOH, and pure VOH at different scan rates.

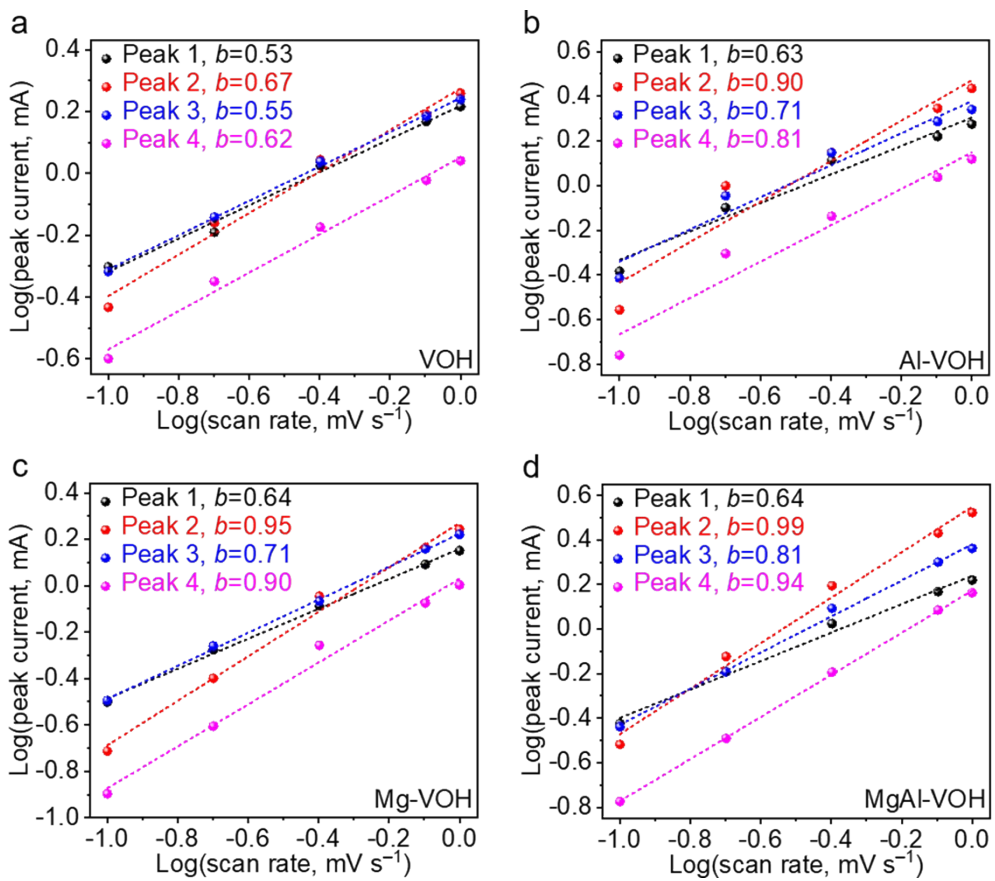

Fig. S12 The extraction of capacitive contribution for MgAl-VOH, Mg-VOH, Al-VOH, and pure VOH, respectively. (a–d) The *b* values of such four electrodes.

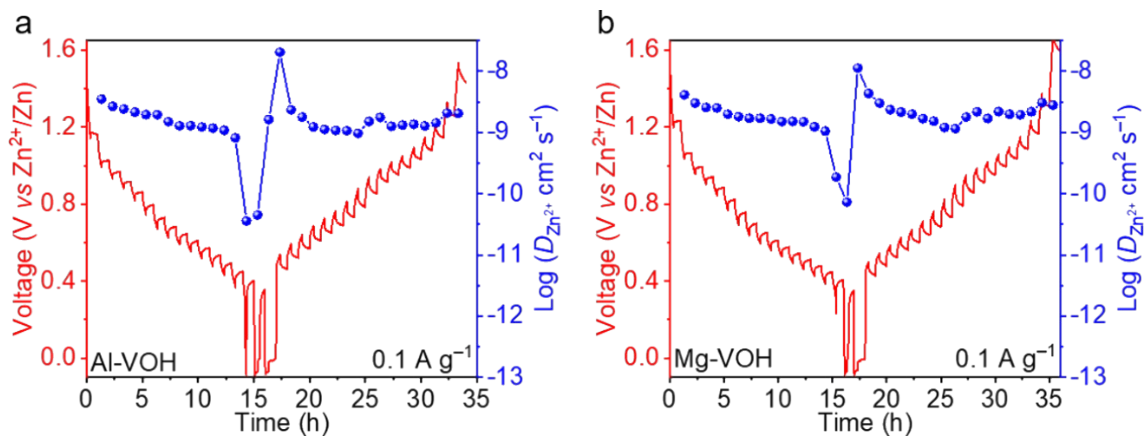

Fig. S13  $\text{Zn}^{2+}$  ion diffusion coefficients in Mg-VOH and Al-VOH during the charging and discharging processes.

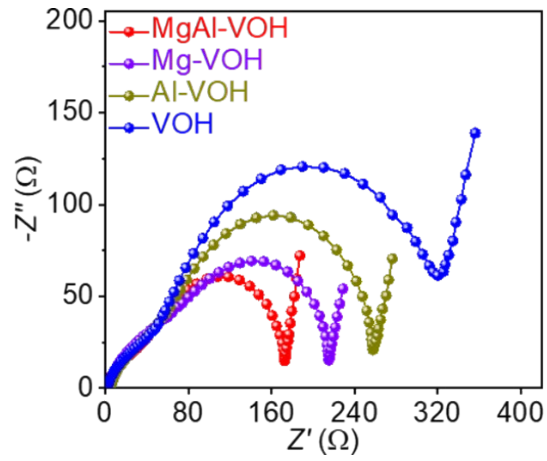

Fig. S14 EIS results of MgAl-VOH, Mg-VOH, Al-VOH, and pure VOH. The smaller resistance in MgAl-VOH than those in Mg-VOH, Al-VOH, and pure VOH indicates the faster charge transfer.

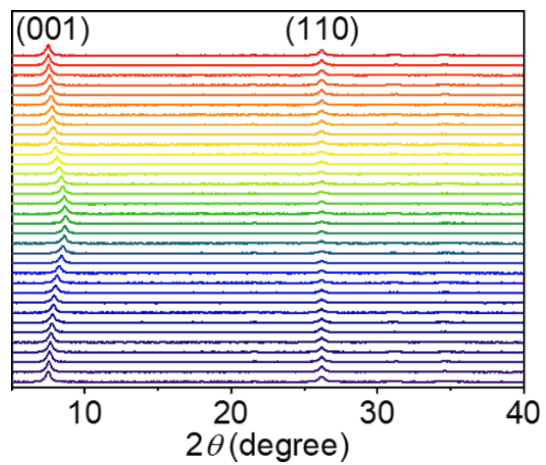

Fig. S15 In-situ XRD patterns of MgAl-VOH during the charging and discharging processes. The unchanged (110) characteristic peak indicates the high structure stability of MgAl-VOH.



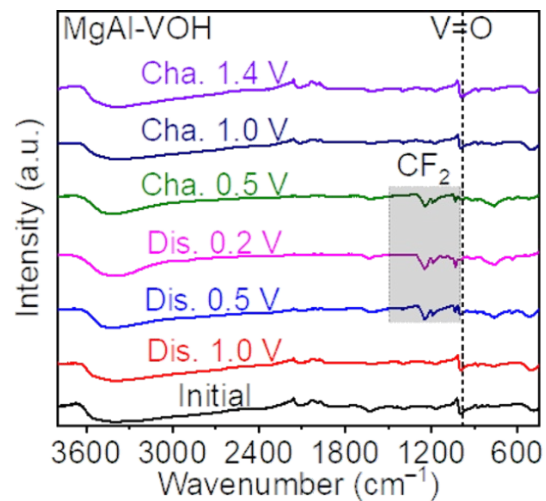

Fig. S16 Ex-situ FTIR of MgAl-VOH at different charging and discharging states. The formation of  $Zn_x(OH)_y(CF_3SO_3)_{2x-y} \cdot nH_2O$  by-product confirms the co-de/intercalation mechanism of  $Zn^{2+}/H^+$  ions.

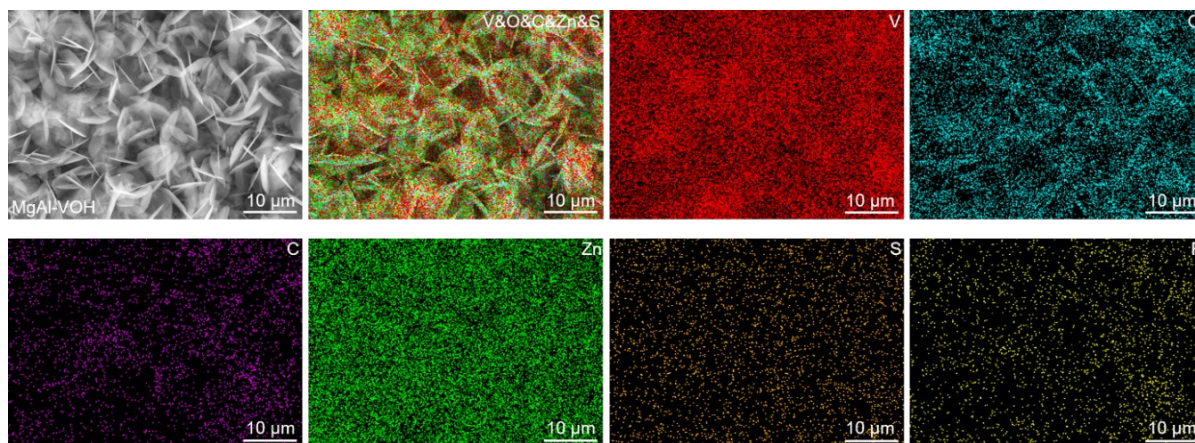

Fig. S17 EDS mapping images of MgAl-VOH after discharging to 0.2 V, reconfirming the co-de/intercalation mechanism of  $\text{Zn}^{2+}/\text{H}^+$  ions.

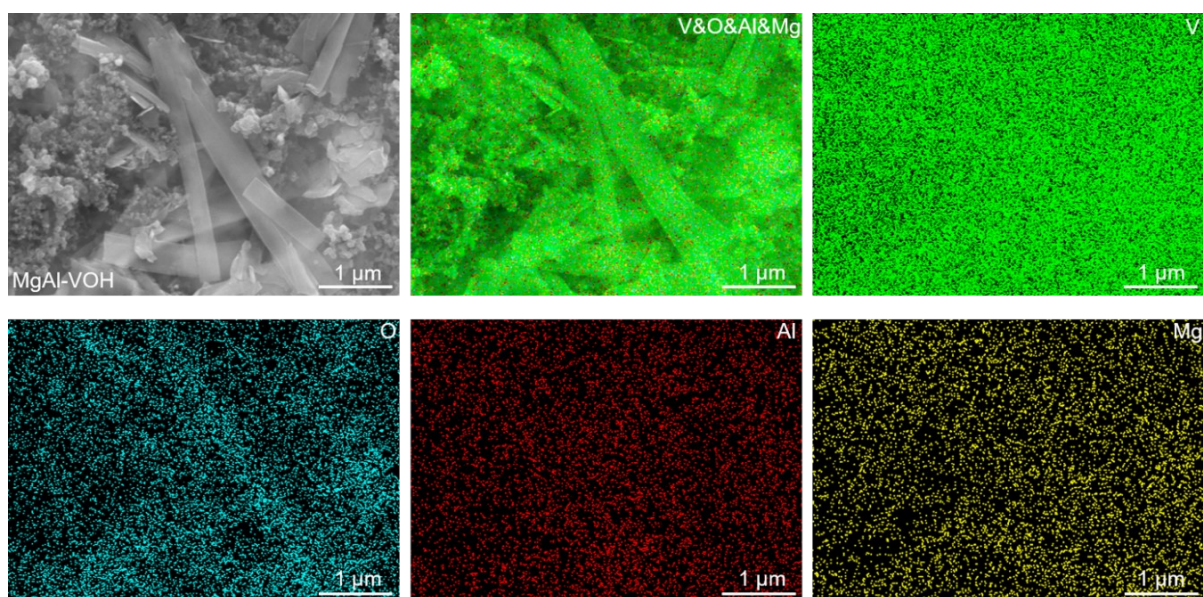

Fig. S18 EDS mapping images of MgAl-VOH at the initial state, showing the uniform distributions of Mg, Al, V, and O elements.

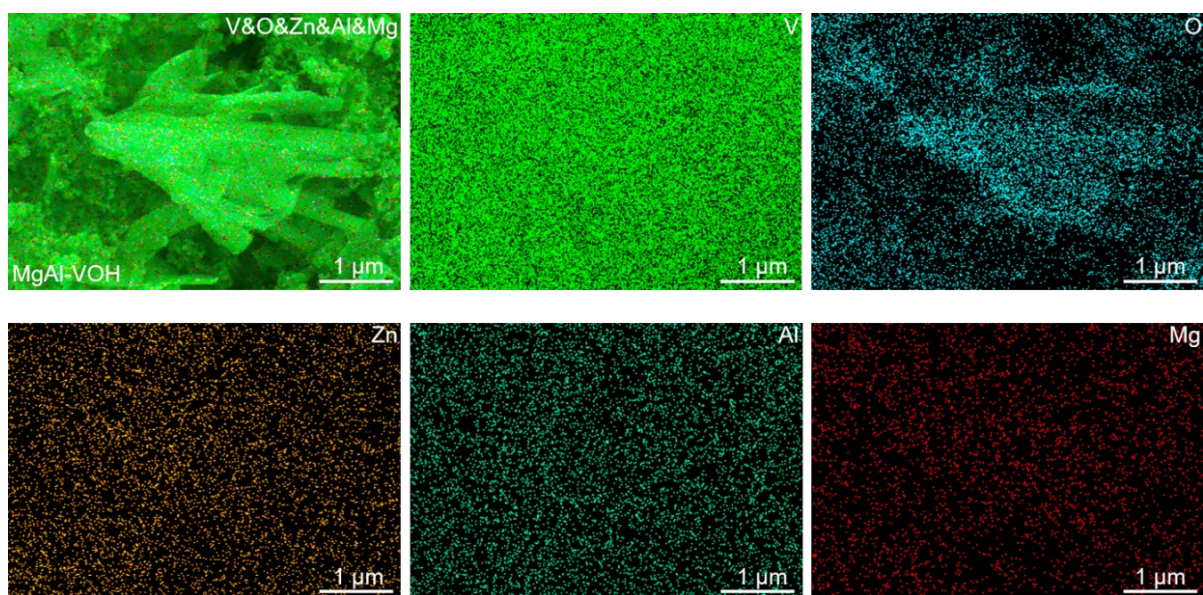

Fig. S19 EDS mapping images of MgAl-VOH after charging to 1.4 V, revealing its robust structure.

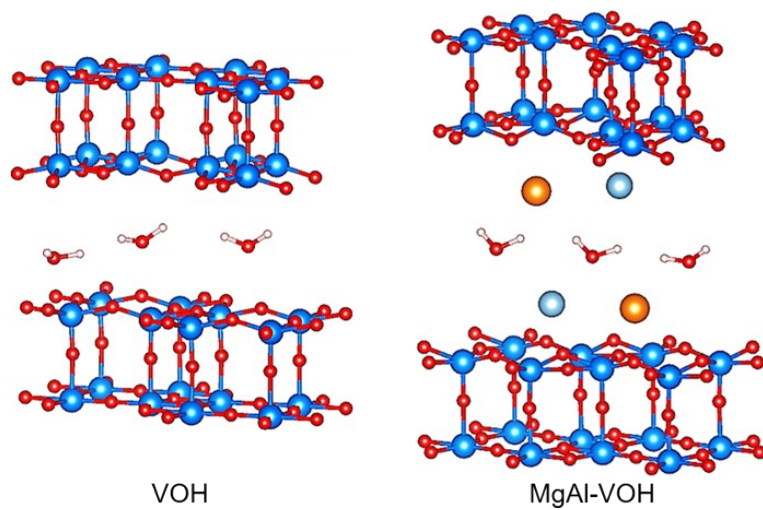

Fig. S20 The optimized atomic models of MgAl-VOH and pure VOH, respectively.

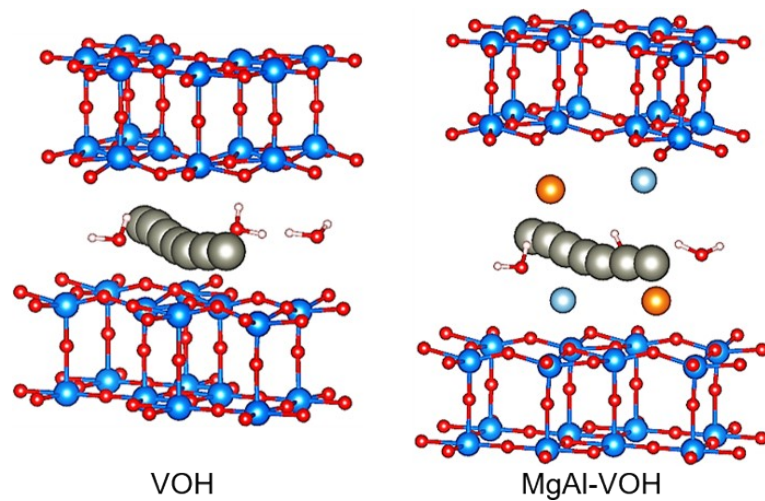

Fig. S21 The migration pathways of Zn<sup>2+</sup> ions in MgAl-VOH and pure VOH, respectively.

Table S1 ICP-OES results of MgAl-VOH, Mg-VOH, Al-VOH, and pure VOH.

| Sample   | Element | Content |
|----------|---------|---------|
| MgAl-VOH | Mg      | 1.0%    |
|          | Al      | 0.8%    |
|          | V       | 42.2%   |
| Mg-VOH   | Mg      | 1.2%    |
|          | V       | 45.8%   |
| Al-VOH   | Al      | 0.8%    |
|          | V       | 45.4%   |
| VOH      | V       | 49.3%   |

Table S2 FTIR results of MgAl-VOH, Mg-VOH, Al-VOH, and pure VOH.

| Sample   | Peak position (cm <sup>-1</sup> ) | FWHM (cm <sup>-1</sup> ) |
|----------|-----------------------------------|--------------------------|
| MgAl-VOH | 1008                              | 41                       |
| Mg-VOH   | 1007                              | 56                       |
| Al-VOH   | 1004                              | 60                       |
| VOH      | 1002                              | 72                       |



Table S3 EXAFS fitting parameters at V *K*-edge for various samples (*S0 2*=0.75).

| Sample          | Shell | $N^a$   | $R(\text{\AA})^b$ | $\sigma^2(\text{\AA}^2)^c$ | $\Delta E_0$<br>(eV) <sup>d</sup> | R factor |
|-----------------|-------|---------|-------------------|----------------------------|-----------------------------------|----------|
| <b>V foil</b>   | V-V   | 8*      | 2.61±0.01         | 0.0078±0.0065              | 3.9±0.8                           | 0.007    |
|                 | V-V   | 6*      | 3.00±0.01         | 0.0075±0.0011              |                                   |          |
| <b>MgAl-VOH</b> | V=O   | 0.7±0.5 | 1.59±0.04         | 0.0071±0.0025              | 6.0±2.6                           | 0.012    |
|                 | V=O   | 3.0±0.9 | 1.90±0.01         |                            |                                   |          |
|                 | V-V   | 2.0±0.6 | 3.03±0.02         |                            |                                   |          |
| <b>VOH</b>      | V=O   | 0.8±0.3 | 1.65±0.02         | 0.003*                     | 6.0±2.4                           | 0.027    |
|                 | V=O   | 2.2±0.3 | 1.92±0.01         |                            |                                   |          |
|                 | V-V   | 1.3±0.2 | 3.03±0.02         |                            |                                   |          |

<sup>a</sup> $N$ : coordination number; <sup>b</sup> $R$ : bond length; <sup>c</sup> $\sigma^2$ : Debye-Waller factors; <sup>d</sup> $\Delta E_0$ : inner potential correction;  $R$  factor: goodness of fit. *S0 2* was set to be 0.75, according to the experimental EXAFS fit of V foil by fixing CN as the known crystallographic value.

Table S4 ICP-OES results of MgAl-VOH with different Mg<sup>2+</sup> and Al<sup>3+</sup> ions concentrations.

|    | MgAl-VOH-1 | MgAl-VOH | MgAl-VOH-2 | MgAl-VOH-3 | MgAl-VOH-4 |
|----|------------|----------|------------|------------|------------|
| Mg | 0.6 wt%    | 1.0 wt%  | 1.7 wt%    | 2.3 wt%    | 2.4 wt%    |
| Al | 0.5 wt%    | 0.8 wt%  | 1.6 wt%    | 1.9 wt%    | 2.3 wt%    |

Table S5 Capacity comparison of MgAl-VOH with the other vanadium oxides at different current densities.

| Sample                                          | Current density<br>(A g <sup>-1</sup> ) | Capacity<br>(mAh g <sup>-1</sup> ) | Cycling number | Reference        |
|-------------------------------------------------|-----------------------------------------|------------------------------------|----------------|------------------|
| PEO-LVO                                         | 0.1                                     | 438                                | 3000           | 1                |
| MVOH                                            | 0.1                                     | 405                                | 900            | 2                |
| HVO                                             | 0.1                                     | 323                                | 1000           | 3                |
| NVO/PoPDA@GO                                    | 0.5                                     | 433                                | 1000           | 4                |
| NVOH                                            | 0.05                                    | 366                                | 1000           | 5                |
| MNVO                                            | 0.1                                     | 410                                | 5000           | 6                |
| PEDOT-NVO                                       | 0.05                                    | 356                                | 5000           | 7                |
| O <sub>v</sub> -ZVO                             | 0.1                                     | 402                                | 2000           | 8                |
| O <sub>d</sub> -VO                              | 0.2                                     | 405                                | 2000           | 9                |
| NaCaVO                                          | 0.1                                     | 347                                | 2000           | 10               |
| AlVO-DMF                                        | 0.1                                     | 401                                | 2000           | 11               |
| (1Zn, 1Ch)-VOH                                  | 0.5                                     | 424                                | 2000           | 12               |
| CO <sub>2</sub> -V <sub>6</sub> O <sub>13</sub> | 0.1                                     | 471                                | 4000           | 13               |
| NiVO-BTA                                        | 0.2                                     | 464                                | 1600           | 14               |
| <b>MgAl-VOH</b>                                 | <b>0.1</b>                              | <b>524</b>                         | <b>3000</b>    | <b>This work</b> |

1. M. H. Wu, C. Shi, J. W. Yang, Y. Zong, Y. Chen, Z. G. Ren, Y. X. Zhao, Z. Li, W. Zhang, L. Y. Wang, X. L. Huang, W. Wen, X. L. Li, X. Ning, X. C. Ren and D. M. Zhu, *Adv. Mater.*, 2024, **36**, 2310434.
2. L. Yang, Y.-J. Zhu, F. L. Zeng, H.-P. Yu, L.-Y. Dong, J. C. Tao, G. He and H. Li, *Energy Storage Mater.*, 2024, **65**, 103162.
3. N. N. Liu, X. Wu, L. S. Fan, S. Gong, Z. K. Guo, A. S. Chen, C. Y. Zhao, Y. C. Mao, N. Q. Zhang and K. N. Sun, *Adv. Mater.*, 2020, **32**, 1908420.
4. M. Li, M. Z. Liu, Y. Y. Lu, G. D. Zhang, Y. Zhang, Z. Y. Li, Q. J. Xu, H. M. Liu and Y. G. Wang, *Adv. Funct. Mater.*, 2024, **34**, 2312789.
5. Y. Liu, C. J. Lu, Y. T. Yang, W. S. Chen, F. Ye, H. L. Dong, Y. P. Wu, R. Z. Ma and L. F. Hu, *Adv. Mater.*, 2024, **36**, 2312982.
6. X. R. Wang, Y. L. Wang, A. Naveed, G. T. Li, H. W. Zhang, Y. Zhou, A. C. Dou, M. R. Su, Y. J. Liu, R. Q. Guo and C. C. Li, *Adv. Funct. Mater.*, 2023, **33**, 2306205.
7. D. Bin, W. C. Huo, Y. B. Yuan, J. H. Huang, Y. Liu, Y. X. Zhang, F. Dong, Y. G. Wang and Y. Y. Xia, *Chem*, 2020, **6**, 968–984.
8. J.-J. Ye, P.-H. Li, H.-R. Zhang, Z.-Y. Song, T. J. Fan, W. Q. Zhang, J. Tian, T. Huang, Y. T. Qian, Z. G. Hou, N. Shpigel, L.-F. Chen and S. X. Dou, *Adv. Funct. Mater.*, 2023, **33**, 2305659.
9. M. Liao, J. W. Wang, L. Ye, H. Sun, Y. Z. Wen, C. Wang, X. M. Sun, B. J. Wang and H. S. Peng, *Angew. Chem. Int. Ed.*, 2020, **132**, 2293–2298.
10. K. Y. Zhu, T. Wu and K. Huang, *Adv. Energy Mater.*, 2019, **9**, 1901968.
11. F. Wan, Z. M. Hao, S. Wang, Y. X. Ni, J. C. Zhu, Z. W. Tie, S. S. Bi, Z. Q. Niu and J. Chen, *Adv. Mater.*, 2021, **33**, 2102701.
12. Q. Zong, Y. L. Zhuang, C. F. Liu, Q. L. Kang, Y. Z. Wu, J. J. Zhang, J. Y. Wang, D. W. Tao, Q. L. Zhang and G. Z. Cao, *Adv. Energy Mater.*, 2023, **13**, 2301480.
13. W. Shi, B. S. Yin, Y. Yang, M. B. Sullivan, J. Wang, Y.-W. Zhang, Z. G. Yu, W. S. V. Lee and J. M. Xue, *ACS Nano*, 2021, **15**, 1273–1281.
14. J. D. Guo, J. X. Liu, W. B. Ma, Z. Y. Sang, L. C. Yin, X. Q. Zhang, H. Chen, J. Liang and D. A. Yang, *Adv. Funct. Mater.*, 2023, **33**, 2302659.
